# Supplementary material
Source: MDPI journal article supplement (https://www.mdpi.com/1999-4907/11/11/1227)
Supplement: s1 [file s1]

## Electronic Supplementary Materials: 2 figures

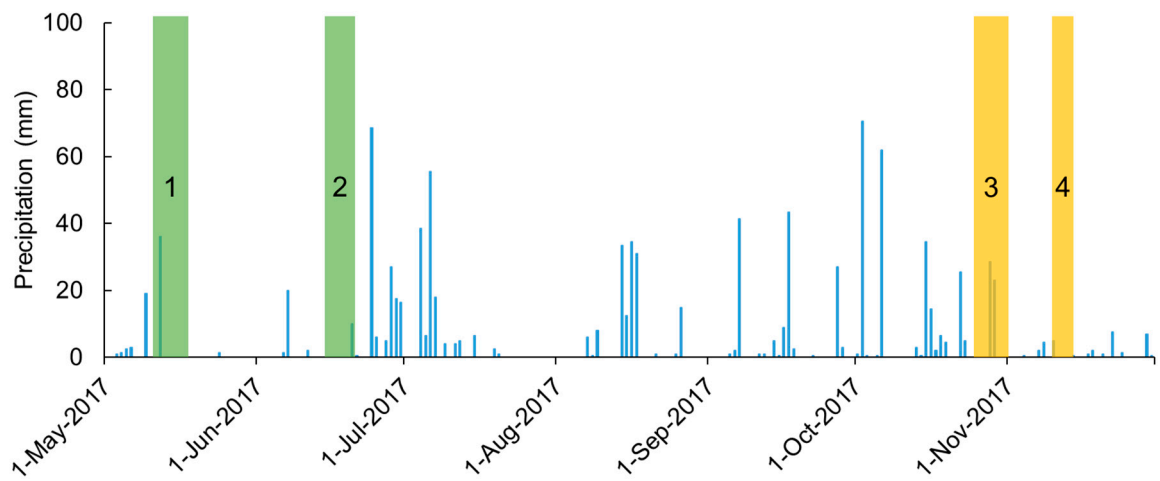

**Figure S1.** Precipitation (mm) was recorded at a 2 m tower in an open space approximately 200 m from the studied site in 2017 (Jeong et al. 2019b). Gray bars with numbers represent sampling periods from 1) *Cryptomeria japonica* intact tree plot, 2) *Chamaecyparis obtusa* intact tree plot, 3) *Ch. obtusa* cut tree plot, and 4) *Cr. japonica* cut tree plot. Sampling was conducted 48 hours after a rainfall event.

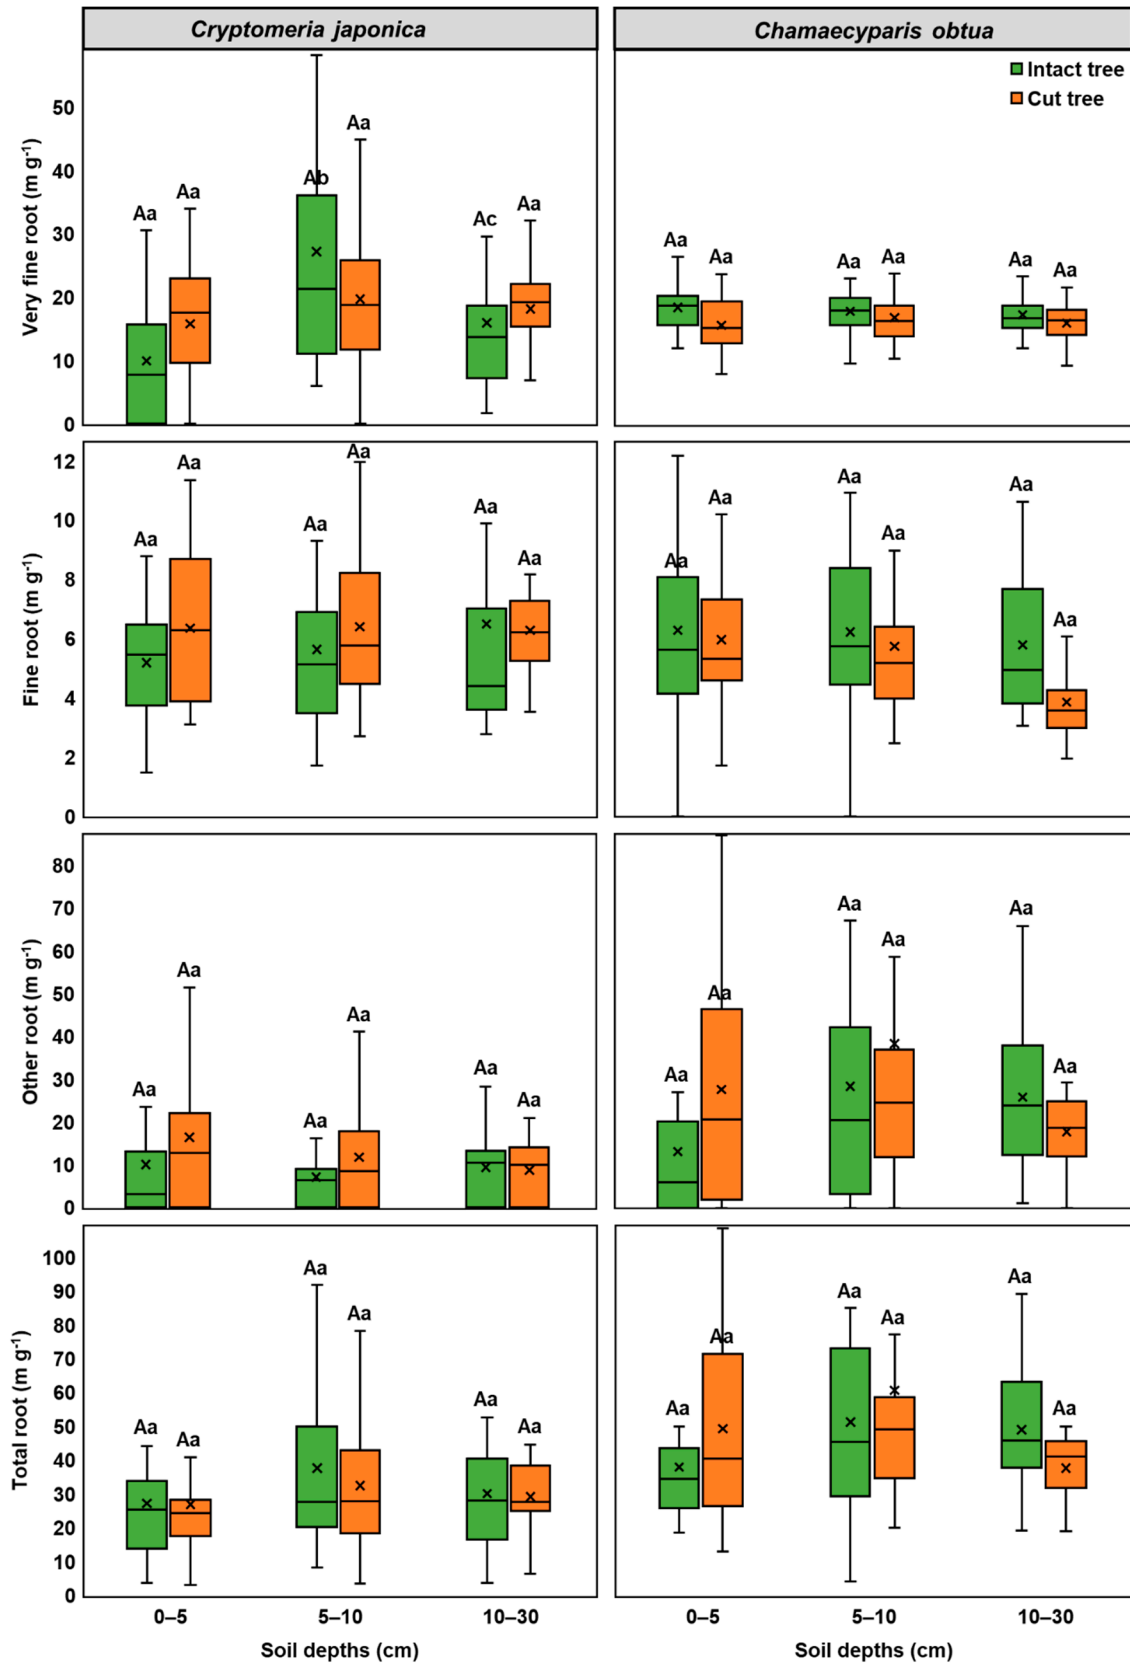

**Figure S2.** Specific root length (SRL,  $m\ g^{-1}$ ) for different soil depths of *Cryptomeria japonica* and *Chamaecyparis obtusa* intact tree and cut tree plots. Capital and small letters denote significant differences between plots and different soil depths, respectively ( $n = 20$ ).
